# Supplementary material for: Nanogap Electrode-Enabled Versatile Electrokinetic Manipulation of Nanometric Species in Fluids
Source: Biosensors (Basel). 2022 Jun 24;12(7):451. doi: 10.3390/bios12070451 (PMC9313323; doi:10.3390/bios12070451)
Supplement: Supplementary file 1 [file biosensors-12-00451-s001.zip]

Archive with 8 entries (8 files):
- biosensors-1775522-supplementary.pdf
- Video S1.avi
- Video S2.avi
- Video S3.avi
- Video S4.avi
- Video S5.avi
- Video S6.avi
- Video S7.avi
